# Supplementary material for: Single-Cell Analysis of Tumor-Specific Neutrophils During Gastric Cancer Progression Inspired a Hippo Targeted Antitumor Therapy
Source: Research Square preprint supplement (doi:10.21203/rs.3.rs-533205/v1), 2021-05-27
Supplement: Supplementary file 1 [file df7c7c5e5849958319f10d30.pdf]

## **SUPPLEMENTAL INFORMATION**

### **Single-Cell Analysis of Tumor-Specific Neutrophils During Gastric Cancer Progression Inspired a Hippo Targeted Antitumor Therapy**

Pingping Nie, Weihong Zhang, Yan Meng, Fenghua Guo, Hui Zhang, Zhenzhu Tong, Meng Wang, Fan Chen, Liwei An, Yi Han, Wenjia Wang, Linxin Wei, Zhaocai Zhou, Shi Jiao

SUPPLEMENTAL FIGURES

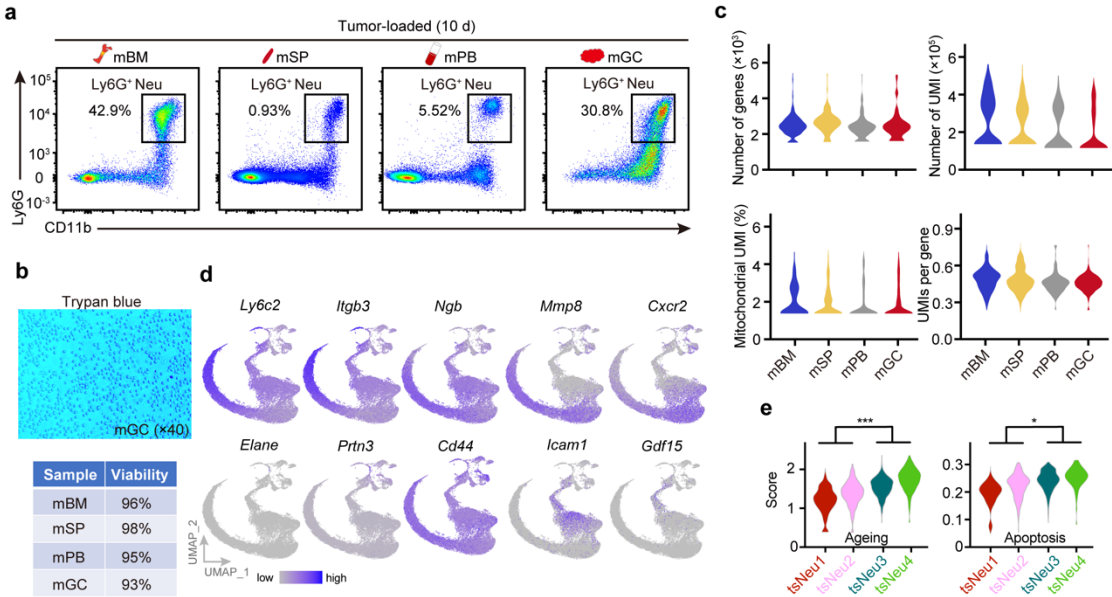

**Figure S1** Neutrophil Displays Transcriptomic Heterogeneity. **(a)** Ly6G-positive Neu in BM, SP, PB and GC sorted from three tumor-bearing mice according to the gating strategy. **(b)** The viability of Neutrophil from panel A was measured and then loaded on a 10×Chromium Single Cell Controller. **(c)** Violin plots of the number of genes, number of UMIs, mitochondria UMI percentage, and UMI per gene of all QC-passed cells in the indicated samples. **(d)** Transcriptional pattern of the indicated gene projected on the UMAP plot. **(e)** Violin plots of ageing score and apoptosis score for the indicated cluster.

Related to **Figure 1**

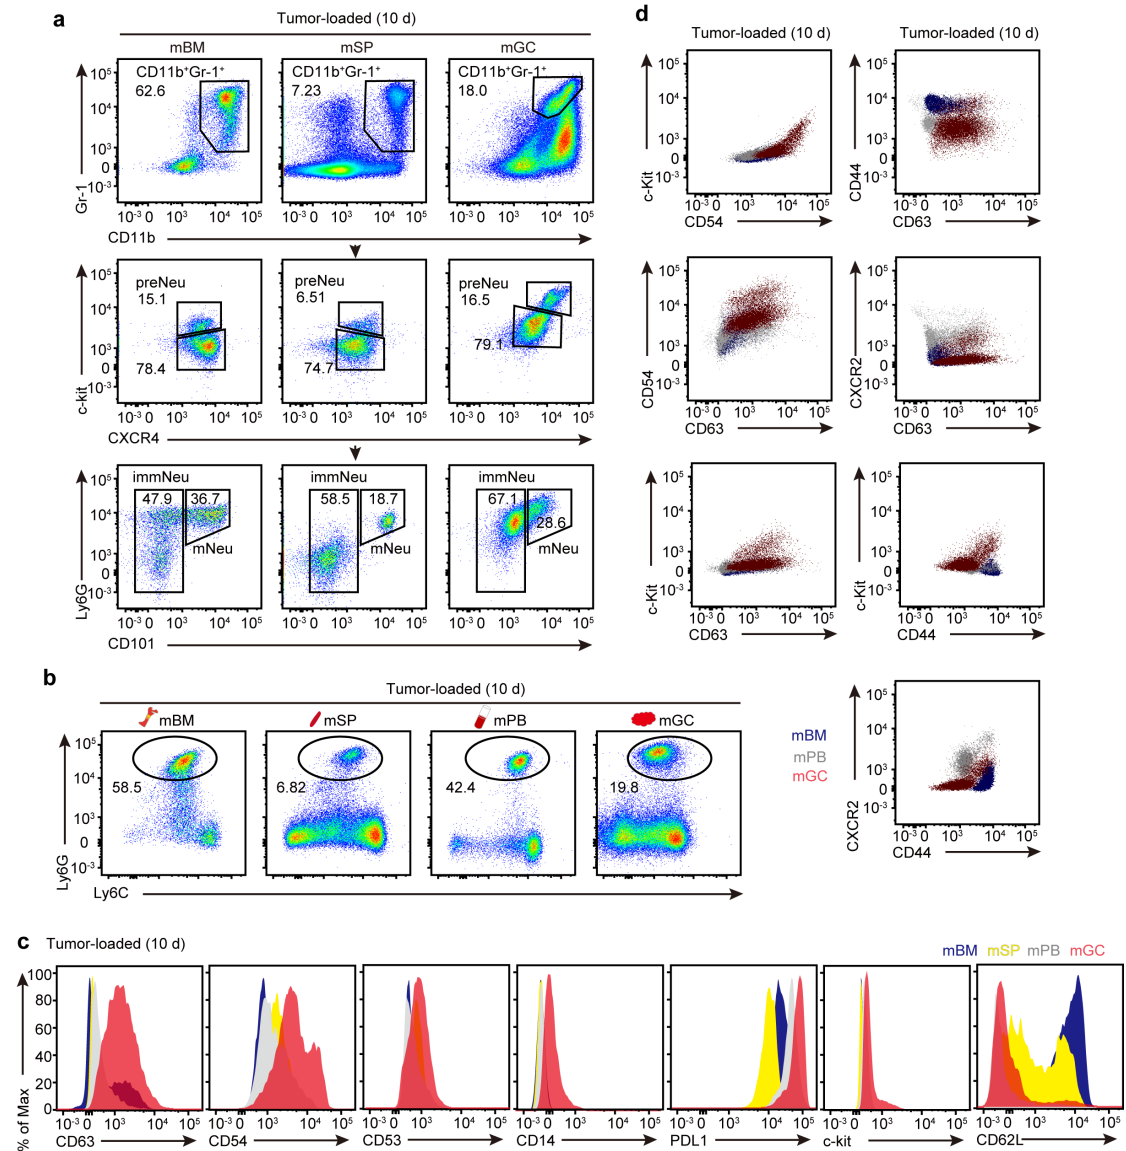

**Figure S2** Neutrophil Displays Morphological and Functional Heterogeneity. **(a)** Representative FACS plots of preNeu, immNeu and mNeu from tumor-bearing mice according to the indicated gating strategy. **(b)** Representative FACS plots of total Neu (Ly6G<sup>+</sup>Ly6C<sup>lo</sup>) in BM, SP, PB and GC from tumor-bearing mice. **(c)** Histograms of the indicated surface marker in total Neu from the indicated samples. **(d)** Differential expression represented by plotting the indicated marker.

Related to **Figure 2**

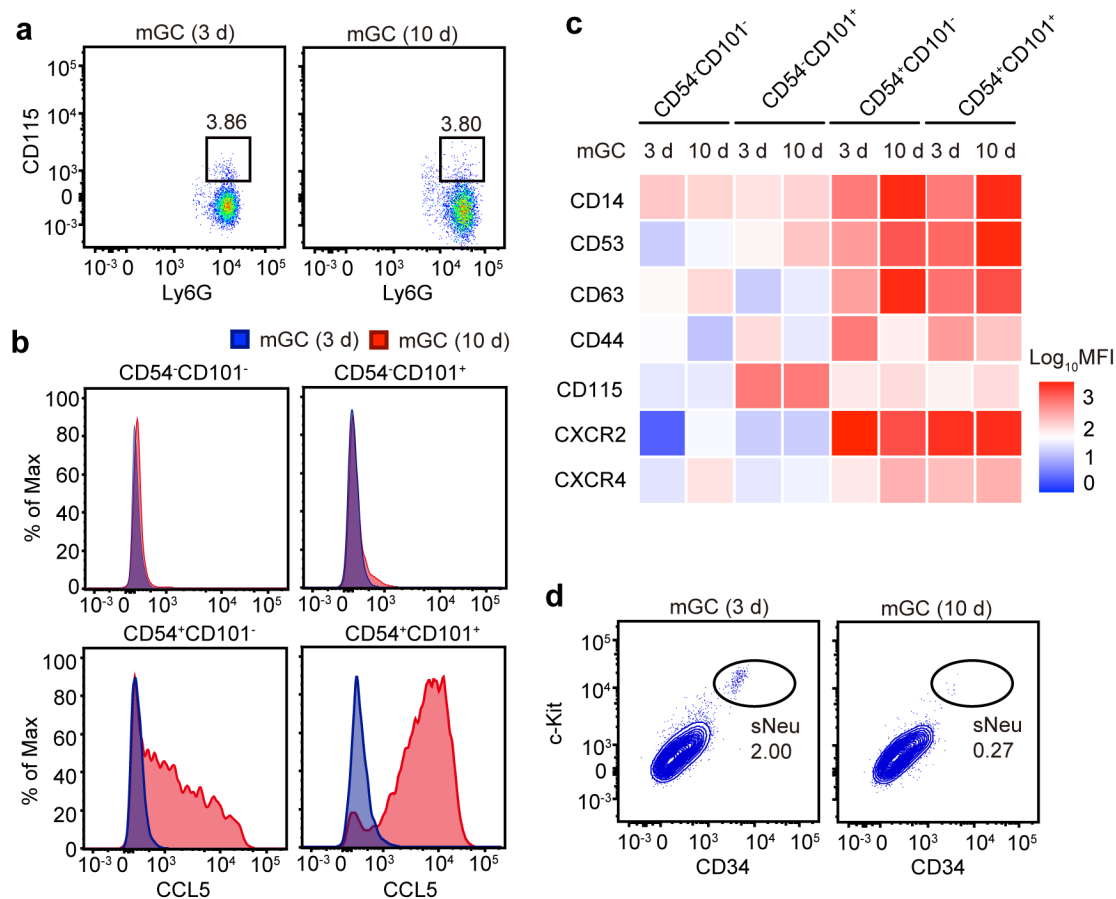

**Figure S3** Tracing Neu Subpopulations in Tumor. **(a)** Expression of CD115 in Ly6G<sup>+</sup> cells. **(b)** Histograms of CCL5 in the various tsNeu subpopulations from mice bearing tumors for 3 days (blue) or 10 days (red). **(c)** Heatmap showing the expression of the indicated markers in the tsNeus from murine tumor tissues (3d or 10 d). **(d)** Representative FACS plots of sNeu from the indicated samples.

Related to **Figure 3**

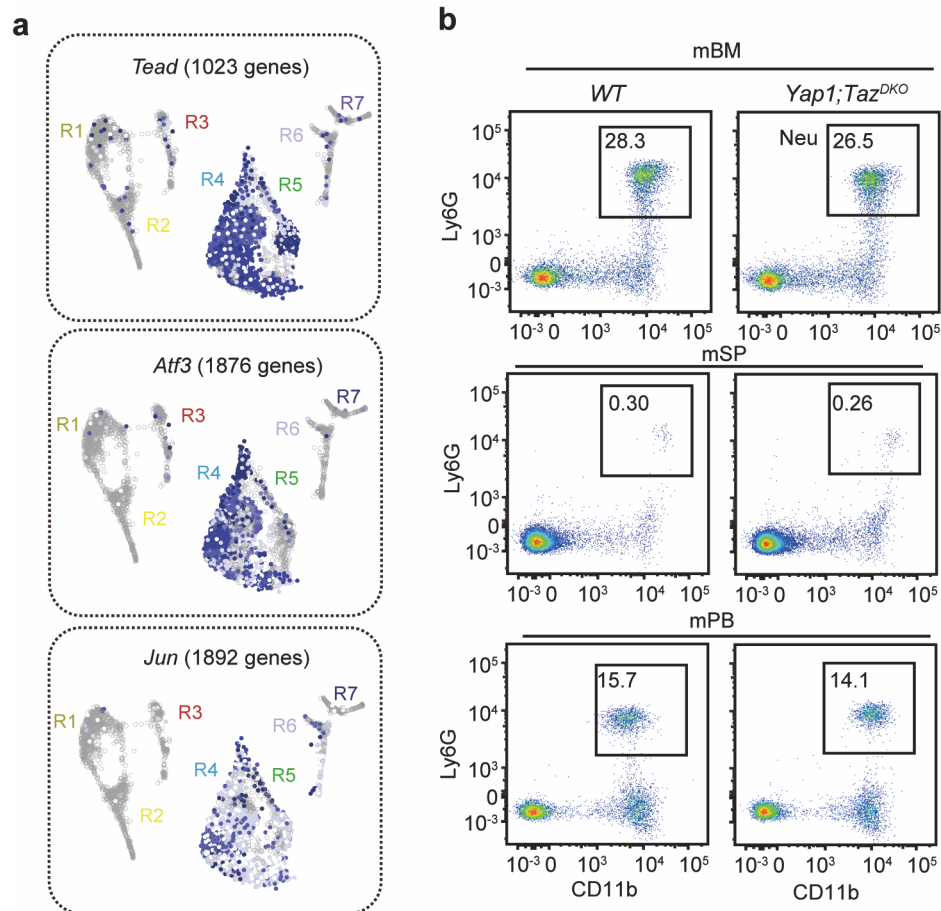

**Figure S4** YAP/TAZ Deficiency Has no Influence on the Neutrophil Development in Bone Marrow, Spleen and Peripheral Blood. **(a)** Activities of the three identified tsNeu-associated regulons. Activities of *Teads*, *Arf3* and *Jun* projected on the UMAP plots. **(b)** CD11b<sup>+</sup>Ly6G<sup>+</sup> Neu in bone marrow (mBM), spleen (mSP) and peripheral blood (mPB) from the indicated tumor-bearing mice.

Related to **Figure 4**



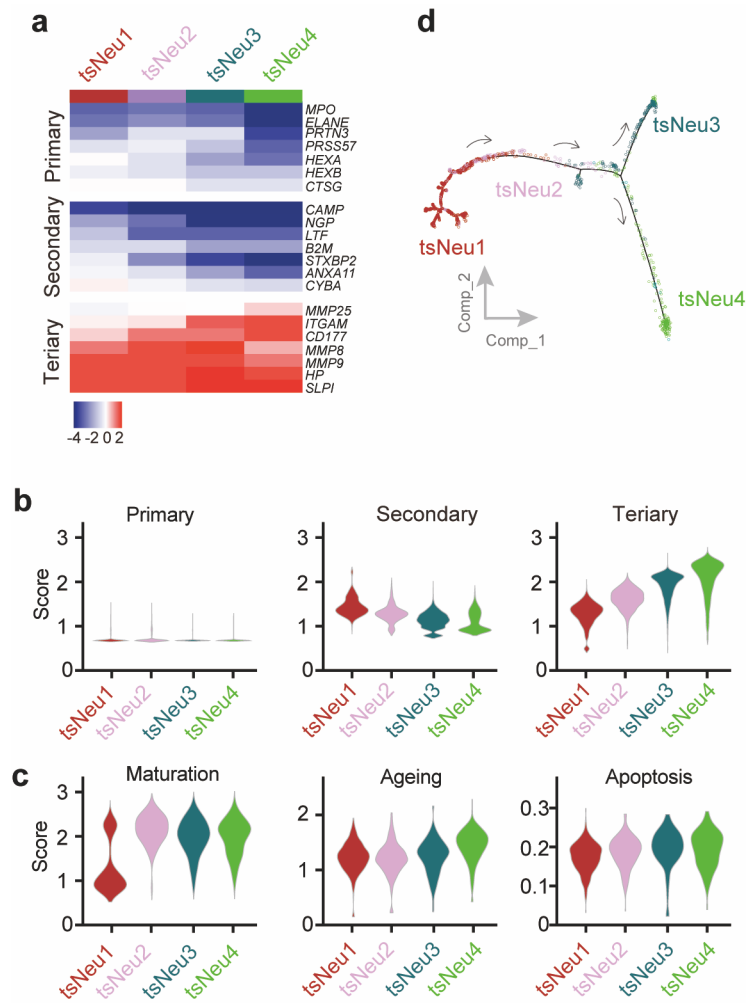

**Figure S6** sc-Seq of Human GC Samples Characterizes Four tsNeu Subsets. **(a)** Heatmap showing the expression of selected functionally relevant gene. **(b,c)** Violin plots of primary (azurophil) score, secondary (specific) score, tertiary (gelatinase score and secretory) score, mature score, aging score and apoptosis score for the Neu clusters. **(d)** Trajectory prediction for the tsNeu subsets.

Related to **Figure 6**

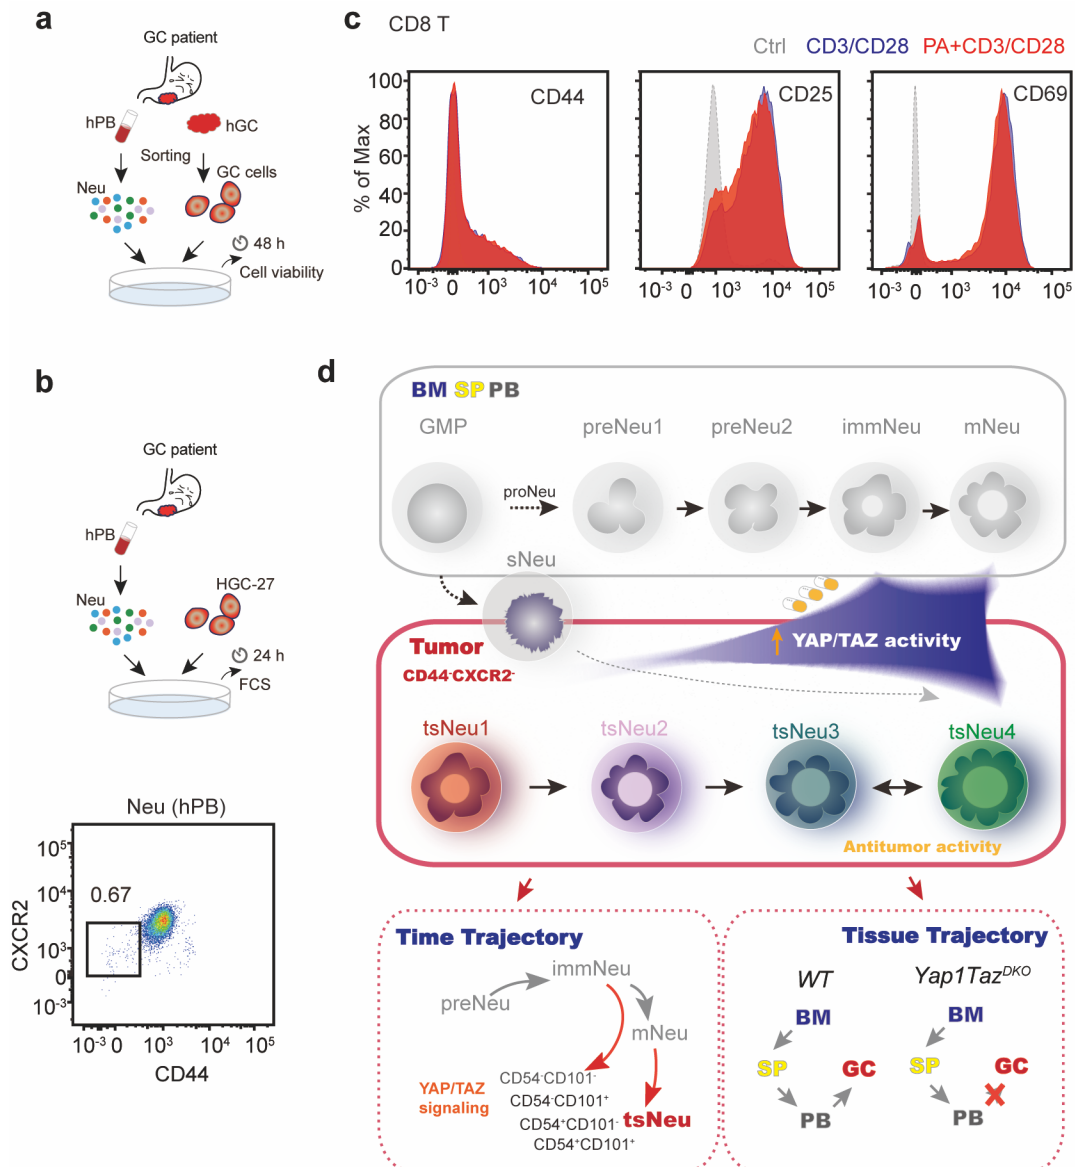

**Figure S7** Hippo Agonist Reprograms Neutrophils for Anti-tumor Immunotherapy. **(a)** Experimental workflow of *in vitro* human neutrophil tumor-killing assay after incubation with PA. **(b)** CD44<sup>+</sup>CXCR2<sup>+</sup> Neu in PA-treated peripheral blood from GC patient. **(c)** CD3/CD28-induced T activation in the splenic CD8<sup>+</sup> T cells after treatment with PA for 3 days. **(d)** A Schematic Illustration for the Neu Therapy. Our study defines CXCR2<sup>neg</sup>CD44<sup>neg</sup> neutrophils as tsNeus, which can be further classified/separated into four subsets according to their expression of CD54 and CD101. Molecular dissection of tsNeus identified the Hippo pathway transcriptional coactivators YAP/TAZ as essential factors for the generation and function of teNeus. By pharmacological targeting the Hippo pathway, we show a proof of concept being able to reprogram neutrophils for anti-tumor immunotherapy.

Related to **Figure 7**
